# Supplementary figures and images for: Symmetric dithiodigalactoside: strategic combination of binding studies and detection of selectivity between a plant toxin and human lectins
Source: Royal Society of Chemistry journal article supplement (doi:10.1039/c0ob01235a), 2011-01-01

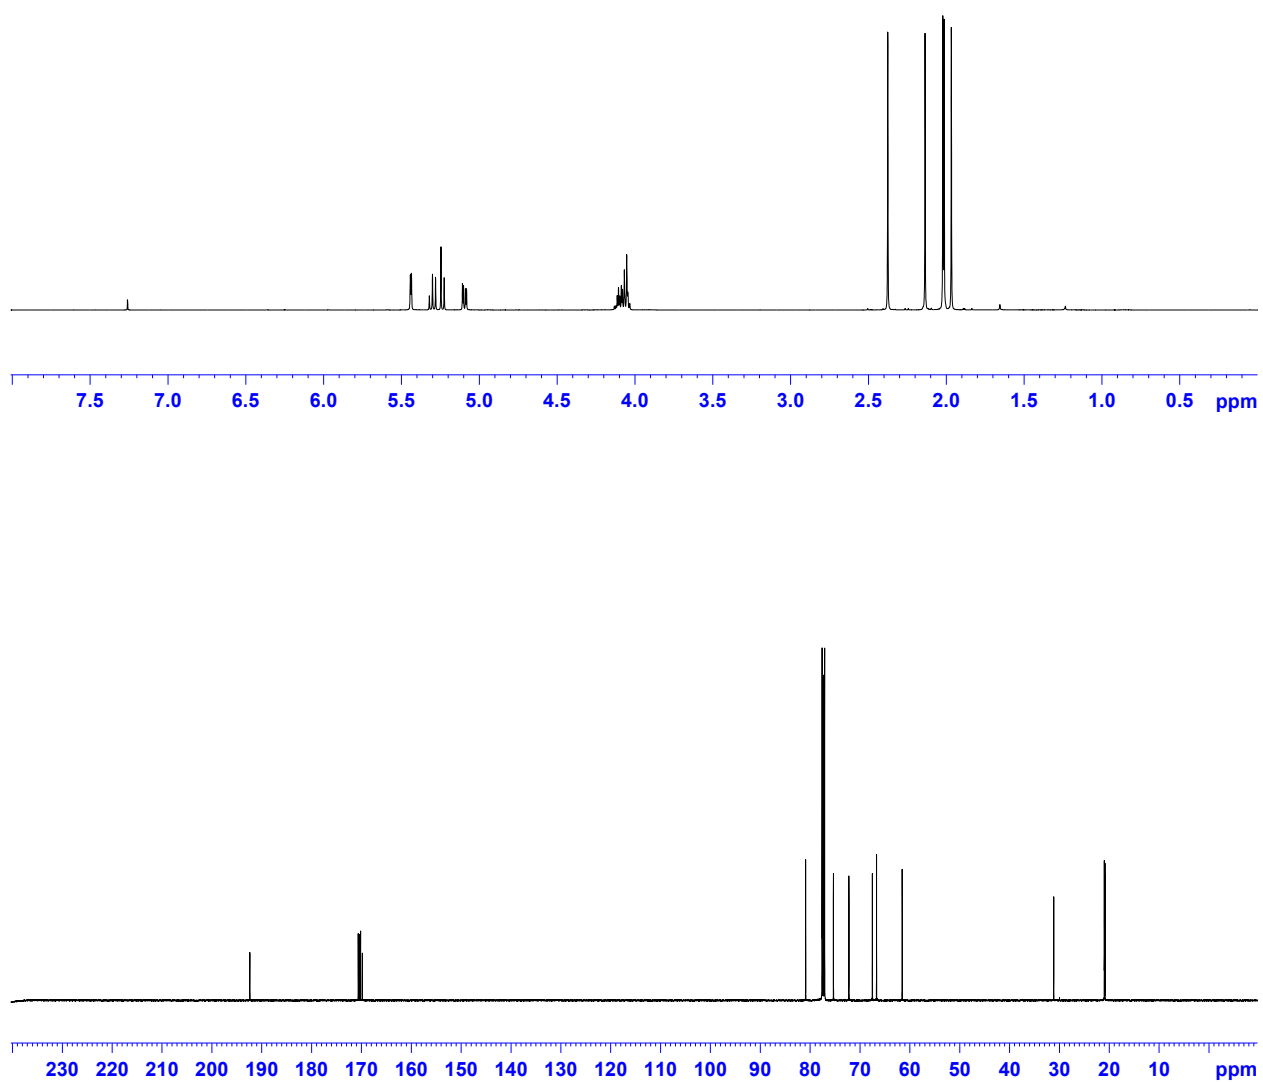

**Figure SX.**  $^1\text{H-NMR}$  (top) and  $^{13}\text{C-NMR}$  (bottom) spectra of compound **2**.

Supplement: c0ob01235a.pdf [file c0ob01235a.pdf]
